# Supplementary material for: RNA virus-mediated changes in organismal oxygen consumption rate in young and old Drosophila melanogaster males
Source: publisher site journal article supplement (doi:10.18632/aging.204593), 2023-03-22
Supplement: Supplementary file [file aging-v15i6-204593-supplementary-material-SD1.pdf]

SUPPLEMENTARY FIGURE

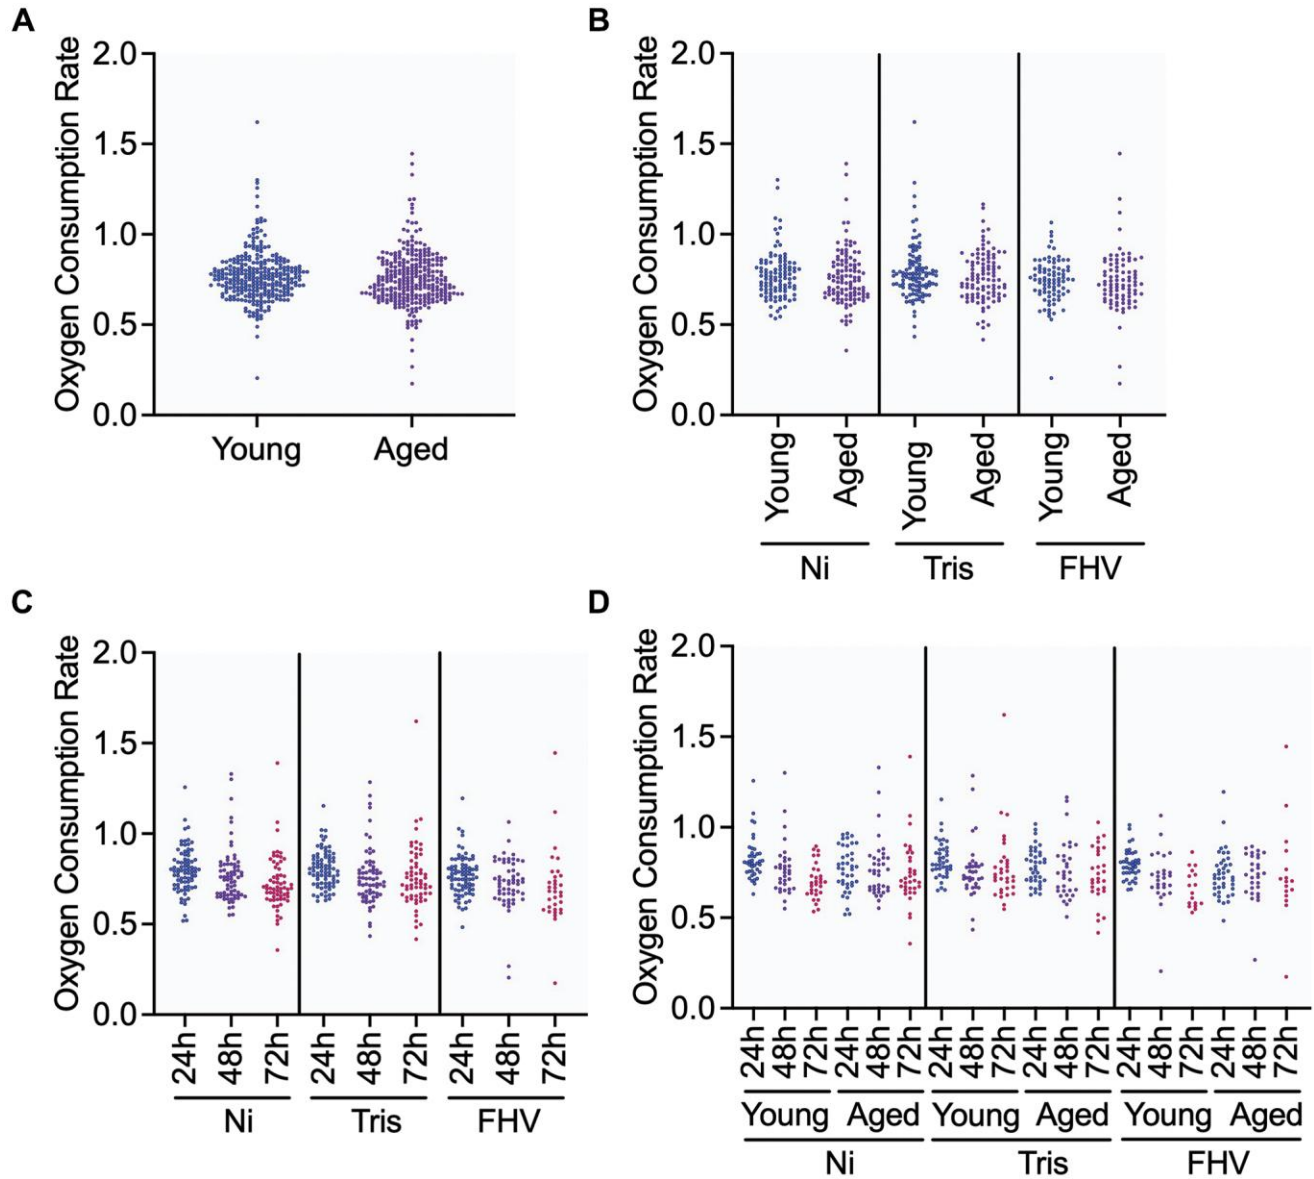

**Supplementary Figure 1.** Graphs showing pairwise comparisons of variables with non-significant main (A) or interaction (B–D) effect(s) on OCR: ‘Age’ (A), ‘Treatment \* Age’ (B), ‘Treatment \* Time Post-Treatment’ (C) and ‘Treatment \* Age \* Time Post-Treatment’ (D). OCR measurement values for individual datapoints are plotted. Each symbol represents an individual OCR measurement on a fly.
