# Supplementary material for: RNA virus-mediated changes in organismal oxygen consumption rate in young and old Drosophila melanogaster males
Source: Aging (Albany NY). 2023 Mar 22;15(6):1748–67. doi: 10.18632/aging.204593 (PMC10085608; doi:10.18632/aging.204593)
Supplement: Supplementary Table 1 [file aging-15-204593-s002.xlsx]

## Sheet: Aging Randomization
Supplementary Table 1. Randomization steps taken during the whole-organism respirometry experiment.
	a. Young Cohort 1: week 1				b. Aged Cohort 1: week 2				c. Aged Cohort 2: week 3				d. Young Cohort 2: week 4
	AGING VIAL NUMBER	RAND	COLLECTED VIALS (~20 flies)		AGING VIAL NUMBER	RAND	COLLECTED VIALS (~20 flies)		AGING VIAL NUMBER	RAND	COLLECTED VIALS (~20 flies)		AGING VIAL NUMBER	RAND	COLLECTED VIALS (~20 flies)
	2	0.00114748	1		6	0.0666378	1		5	0.507421	1		2	0.236394	1
	3	0.236555	2		9	0.0824247	2		3	0.40475	2		4	0.256629	2
	8	0.399937	3		10	0.223827	3		6	0.60581	3		10	0.318776	3
	1	0.557562	4		1	0.432111	4		7	0.78867	4		8	0.388162	4
	5	0.704318	5		8	0.43483	5		1	0.192683	5		7	0.410052	5
	10	0.767394	6		4	0.443129	6		4	0.44697	6		5	0.510779	6
	7	0.836488	7		7	0.548546	7		2	0.254747	7		9	0.616114	7
	4	0.894039	8		5	0.578023	8		9	0.915887	8		3	0.772777	8
	9	0.914435	9		3	0.770911	9		10	0.943088	9		6	0.960545	9
	6	0.923264	10		2	0.98895	10		8	0.858815	10		1	0.966379	10
	COLLECTED VIALS	RAND	ASSIGNED TREATMENT		COLLECTED VIALS	RAND	ASSIGNED TREATMENT		COLLECTED VIAL NUMBER	RAND	ASSIGNED TREATMENT		COLLECTED VIAL NUMBER	RAND	ASSIGNED TREATMENT
	1	0.697469			1	0.0100765	Ni		1	0.507421	FHV		1	0.248081	Tris
	2	0.66373			2	0.173171	Ni		2	0.40475	Tris		2	0.673071
	3	0.590958			3	0.199325	Tris		3	0.60581	FHV		3	0.875998
	4	0.581655			4	0.315754	Tris		4	0.78867			4	0.664821
	5	0.468985	Tris		5	0.320085	FHV		5	0.192683	Ni		5	0.10896	Ni
	6	0.119559	Ni		6	0.357326	FHV		6	0.44697	Tris		6	0.157296	Tris
	7	0.476108	Tris		7	0.586241			7	0.254747	Ni		7	0.361147	FHV
	8	0.490499	FHV		8	0.64216			8	0.915887			8	0.543333	FHV
	9	0.506474	FHV		9	0.790022			9	0.943088			9	0.0488499	Ni
	10	0.0385836	Ni		10	0.884431			10	0.858815			10	0.741347

## Sheet: Injection Randomization
Supplementary Table 1. Randomization steps taken during the whole-organism respirometry experiment.
	a. Young Cohort 1: week 1				b. Aged Cohort 1: week 2				c. Aged Cohort 2: week 4				d. Young cohort 2: week 4
	TREATMENT-Fly Number	RAND	VIAL NUMBER		TREATMENT-Fly Number	RAND	VIAL NUMBER		VIAL NUMBER	RAND	TREATMENT-Fly Number		TREATMENT-Fly Number	RAND	VIAL NUMBER
	Tris-2	0.00297838	v1		Ni-13	0.00365528	v1		v5	0.00524084	NI-1		FHV-20	0.0150755	v1
	Tris-12	0.0131145	v2		Tris-19	0.0254842	v2		v31	0.00954111	NI-2		FHV-11	0.0305422	v2
	FHV-16	0.0174579	v3		Tris-14	0.0701392	v3		v44	0.0522766	NI-3		FHV-7	0.049457	v3
	FHV-13	0.0554165	v4		Ni-16	0.0811574	v4		v11	0.091071	NI-4		Tris-17	0.0518074	v4
	Tris-4	0.0979555	v5		FHV-10	0.0933681	v5		v3	0.111342	NI-5		FHV-12	0.0573458	v5
	FHV-2	0.121052	v6		FHV-14	0.172564	v6		v27	0.129162	NI-6		Tris-9	0.0606553	v6
	FHV-1	0.145533	v7		Ni-19	0.1747	v7		v48	0.133434	NI-7		Tris-8	0.0609503	v7
	Tris-11	0.174788	v8		Ni-7	0.183685	v8		v30	0.172547	NI-8		NI-19	0.0772714	v8
	Tris-15	0.177952	v9		Ni-10	0.188309	v9		v17	0.184906	NI-9		NI-16	0.102165	v9
	FHV-12	0.195587	v10		Tris-6	0.189735	v10		v4	0.187994	NI-10		Tris-3	0.105104	v10
	Ni-9	0.238556	v11		Tris-12	0.203567	v11		v26	0.203461	NI-11		NI-1	0.118169	v11
	Tris-17	0.252032	v12		FHV-19	0.222846	v12		v8	0.234302	NI-12		FHV-14	0.123531	v12
	Ni-13	0.28203	v13		Tris-10	0.235339	v13		v50	0.250459	NI-13		FHV-3	0.186374	v13
	Ni-5	0.292311	v14		Ni-20	0.262213	v14		v46	0.2604	NI-14		NI-4	0.20344	v14
	Ni-3	0.30231	v15		Ni-4	0.267531	v15		v40	0.282257	NI-15		Tris-16	0.219207	v15
	FHV-10	0.305225	v16		FHV-13	0.267698	v16		v45	0.289183	NI-16		NI-5	0.235849	v16
	FHV-18	0.316531	v17		FHV-12	0.275448	v17		v52	0.310997	NI-17		Tris-4	0.277739	v17
	FHV-17	0.322672	v18		Tris-11	0.282928	v18		v10	0.34444	NI-18		NI-7	0.296296	v18
	Tris-7	0.401135	v19		FHV-18	0.29047	v19		v29	0.361119	NI-19		NI-15	0.302063	v19
	Tris-20	0.406232	v20		Tris-8	0.302562	v20		v58	0.370655	NI-20		FHV-4	0.305461	v20
	Ni-16	0.407068	v21		FHV-7	0.307336	v21		v22	0.414164	Tris-1		Tris-19	0.321784	v21
	Ni-17	0.447867	v22		Ni-9	0.33054	v22		v14	0.427643	Tris-2		Tris-5	0.350872	v22
	FHV-15	0.456258	v23		Tris-15	0.363014	v23		v24	0.428484	Tris-3		Tris-13	0.368902	v23
	Ni-14	0.483459	v24		Ni-3	0.364197	v24		v1	0.438919	Tris-4		FHV-18	0.392251	v24
	FHV-5	0.515652	v25		Ni-2	0.375892	v25		v12	0.445765	Tris-5		FHV-2	0.417821	v25
	FHV-4	0.534021	v26		Ni-11	0.385111	v26		v51	0.495883	Tris-6		Tris-11	0.45197	v26
	FHV-14	0.582039	v27		FHV-5	0.3987	v27		v42	0.511084	Tris-7		FHV-6	0.464235	v27
	Tris-5	0.590692	v28		Ni-5	0.403371	v28		v19	0.514494	Tris-8		Tris-18	0.46455	v28
	Tris-14	0.635292	v29		Ni-6	0.426705	v29		v38	0.515671	Tris-9		FHV-10	0.490292	v29
	Tris-18	0.639623	v30		Ni-12	0.442331	v30		v37	0.528148	Tris-10		FHV-9	0.510322	v30
	FHV-11	0.659773	v31		FHV-6	0.484585	v31		v34	0.568363	Tris-11		NI-20	0.516541	v31
	FHV-3	0.665019	v32		FHV-20	0.489553	v32		v54	0.568718	Tris-12		FHV-13	0.517069	v32
	FHV-9	0.672659	v33		Tris-17	0.5024	v33		v49	0.590251	Tris-13		NI-18	0.54775	v33
	Tris-3	0.684971	v34		Ni-18	0.506742	v34		v35	0.594152	Tris-14		NI-2	0.587109	v34
	Ni-15	0.69893	v35		FHV-16	0.515931	v35		v25	0.600603	Tris-15		Tris-14	0.615434	v35
	Ni-20	0.700752	v36		Ni-17	0.518124	v36		v7	0.616982	Tris-16		Tris-20	0.620128	v36
	Tris-16	0.703106	v37		Tris-16	0.521133	v37		v15	0.625232	Tris-17		FHV-16	0.641584	v37
	FHV-20	0.711318	v38		Ni-14	0.530202	v38		v21	0.640581	Tris-18		NI-13	0.653247	v38
	Ni-1	0.726044	v39		Tris-2	0.544098	v39		v9	0.655571	Tris-19		NI-6	0.655916	v39
	FHV-7	0.728326	v40		Ni-15	0.546961	v40		v41	0.669392	Tris-20		FHV-8	0.684314	v40
	Tris-9	0.732246	v41		Ni-8	0.614214	v41		v60	0.676288	FHV-1		NI-14	0.751117	v41
	Ni-12	0.747725	v42		Tris-9	0.625958	v42		v47	0.680736	FHV-2		Tris-2	0.759177	v42
	FHV-6	0.759898	v43		Tris-3	0.642666	v43		v57	0.685571	FHV-3		Tris-15	0.776038	v43
	Ni-8	0.763546	v44		Tris-20	0.647946	v44		v6	0.714084	FHV-4		Tris-1	0.784536	v44
	Tris-6	0.765033	v45		FHV-17	0.668648	v45		v56	0.717748	FHV-5		Tris-7	0.793827	v45
	FHV-19	0.80349	v46		Tris-4	0.679377	v46		v20	0.719648	FHV-6		Tris-12	0.810292	v46
	Ni-18	0.827454	v47		FHV-3	0.681688	v47		v53	0.724342	FHV-7		NI-11	0.846197	v47
	Ni-7	0.829461	v48		Ni-1	0.721904	v48		v2	0.733151	FHV-8		FHV-17	0.855523	v48
	Ni-19	0.844019	v49		FHV-4	0.737238	v49		v13	0.745469	FHV-9		NI-17	0.863889	v49
	FHV-8	0.875222	v50		FHV-1	0.749194	v50		v59	0.751207	FHV-10		FHV-15	0.872828	v50
	Tris-1	0.888578	v51		FHV-11	0.767108	v51		v33	0.78195	FHV-11		NI-10	0.88306	v51
	Tris-8	0.891142	v52		FHV-2	0.78371	v52		v39	0.785958	FHV-12		NI-12	0.904031	v52
	Ni-11	0.914854	v53		Tris-13	0.83089	v53		v32	0.804697	FHV-13		NI-3	0.910364	v53
	Tris-19	0.920724	v54		Tris-1	0.878941	v54		v18	0.823928	FHV-14		NI-8	0.922805	v54
	Tris-13	0.931417	v55		Tris-18	0.886913	v55		v36	0.827531	FHV-15		NI-9	0.933887	v55
	Ni-2	0.934816	v56		FHV-8	0.898764	v56		v43	0.830571	FHV-16		Tris-6	0.934151	v56
	Ni-6	0.946163	v57		Tris-7	0.931824	v57		v28	0.878727	FHV-17		Tris-10	0.956815	v57
	Ni-4	0.963088	v58		FHV-9	0.94314	v58		v23	0.888858	FHV-18		FHV-19	0.975491	v58
	Ni-10	0.971473	v59		Tris-5	0.951921	v59		v55	0.94389	FHV-19		FHV-1	0.997855	v59
	Tris-10	0.986203	v60		FHV-15	0.994605	v60		v16	0.969755	FHV-20		FHV-5	0.999545	v60

## Sheet: Plate Randomization
Supplementary Table 1. Randomization steps taken during the whole-organism respirometry experiment.
a. Young Cohort 1: week 1
	Distribution of samples to Plates 1, 2, and 3			Distribution of samples on Plate 1 at 24h				Distribution of samples on Plate 1 at 48h				Distribution of samples on Plate 1 at 72h
	VIAL#	RAND		Plate	VIAL#	RAND		Plate	VIAL#	RAND		Plate	VIAL#	RAND
	v38	0.00794844		A1	v42	0.0189425		A1	Blank	0.044676		A1	v55	0.117973
	v16	0.0504234		A2	v55	0.0584994		A2	v40	0.0448058		A2	Blank	0.12325
	v43	0.0742753		A3	v38	0.237329		A3	Blank	0.0573759		A3	v31	0.133196
	v42	0.0810189		A4	v53	0.303823		A4	v20	0.12046		A4	v58	0.13859
	v14	0.0828459		A5	v20	0.317656		A5	v16	0.150184		A5	v19	0.179358
	v51	0.101274		A6	v31	0.400439		A6	v53	0.169445		A6	v40	0.204582
	v19	0.102478		B1	v46	0.46056		B1	v26	0.187007		B1	v2	0.229665
	v58	0.111899		B2	v43	0.534491		B2	v46	0.18906		B2	v56	0.251694
	v40	0.169989		B3	v16	0.637829		B3	v38	0.263421		B3	v20	0.263334
	v49	0.18766		B4	v33	0.67669		B4	v51	0.317771		B4	v16	0.359121
	v31	0.201634		B5	v2	0.715805		B5	v14	0.318608		B5	v14	0.375348
	v20	0.224629		B6	v14	0.727967		B6	Blank	0.406436		B6	v3	0.378877
	v46	0.231755		C1	v56	0.731295		C1	v42	0.436927		C1	v51	0.394793
	v2	0.240009		C2	v49	0.739174		C2	v19	0.6202		C2	Blank	0.41426
	v3	0.254621		C3	Blank	0.752566		C3	v55	0.670335		C3	v53	0.501282
	v33	0.282818		C4	v26	0.753128		C4	v33	0.673074		C4	v26	0.511731
	v56	0.298256		C5	Blank	0.791311		C5	Blank	0.705723		C5	v33	0.5914
	v55	0.304301		C6	Blank	0.844858		C6	v43	0.722868		C6	v42	0.643374
	v26	0.319446		D1	v40	0.851061		D1	v49	0.723448		D1	Blank	0.64809
	v53	0.350558		D2	v3	0.872526		D2	v2	0.782463		D2	v38	0.667436
	v25	0.418087		D3	v51	0.888975		D3	v31	0.817701		D3	v49	0.687144
	v60	0.419599		D4	Blank	0.959882		D4	v3	0.872518		D4	v43	0.865341
	v32	0.423507		D5	v19	0.968491		D5	v56	0.919224		D5	v46	0.967163
	v5	0.437857		D6	v58	0.97048		D6	v58	0.929482		D6	Blank	0.993288
	v8	0.446663
	v18	0.489206		Distribution of samples on Plate 2 at 24h				Distribution of samples on Plate 2 at 48h				Distribution of samples on Plate 2 at 72h
	v17	0.509727		Plate	VIAL#	RAND		Plate	VIAL#	RAND		Plate	VIAL#	RAND
	v54	0.525574		A1	v8	0.0424713		A1	v8	0.0164738		A1	v60	0.016722
	v22	0.546827		A2	Blank	0.05183		A2	v18	0.023279		A2	v1	0.0308111
	v1	0.547297		A3	v5	0.0612605		A3	Blank	0.0477578		A3	v32	0.0429391
	v59	0.551731		A4	v52	0.145424		A4	v5	0.0772061		A4	v6	0.151698
	v52	0.56995		A5	v18	0.15204		A5	v6	0.0974405		A5	v52	0.151956
	v13	0.580494		A6	v4	0.268121		A6	v60	0.13209		A6	v11	0.178634
	v11	0.599584		B1	v25	0.283983		B1	v4	0.184747		B1	Blank	0.212397
	v6	0.615056		B2	v60	0.385106		B2	v17	0.229063		B2	v8	0.241525
	v29	0.627033		B3	v11	0.399801		B3	v52	0.229111		B3	v22	0.24198
	v44	0.627821		B4	v6	0.449649		B4	v25	0.231831		B4	v4	0.296645
	v50	0.632904		B5	v1	0.500263		B5	Blank	0.234624		B5	v59	0.320548
	v4	0.645837		B6	Blank	0.532884		B6	Blank	0.247649		B6	Blank	0.324853
	v24	0.667124		C1	v32	0.555129		C1	v32	0.290944		C1	v54	0.325905
	v48	0.675796		C2	Blank	0.558997		C2	v50	0.291051		C2	v25	0.32865
	v57	0.679367		C3	v24	0.586364		C3	v59	0.387239		C3	v29	0.420013
	v21	0.69574		C4	v22	0.650707		C4	v1	0.396203		C4	v18	0.542919
	v23	0.734213		C5	v13	0.775983		C5	v22	0.601312		C5	v5	0.558265
	v30	0.74385		C6	v54	0.790802		C6	v54	0.679803		C6	Blank	0.562356
	v47	0.762806		D1	v59	0.874066		D1	v11	0.699241		D1	v44	0.573978
	v28	0.810434		D2	v17	0.887055		D2	v13	0.80618		D2	v13	0.600631
	v34	0.823451		D3	v44	0.914461		D3	v29	0.832869		D3	v17	0.745681
	v37	0.83001		D4	Blank	0.918215		D4	v24	0.839527		D4	v24	0.876588
	v35	0.841148		D5	v50	0.973008		D5	Blank	0.92681		D5	Blank	0.947266
	v41	0.853725		D6	v29	0.975692		D6	v44	0.943239		D6	v50	0.995511
	v10	0.870011
	v7	0.889643		Distribution of samples on Plate 3 at 24h				Distribution of samples on Plate 3 at 48h				Distribution of samples on Plate 3 at 72h
	v39	0.898338		Plate	VIAL#	RAND		Plate	VIAL#	RAND		Plate	VIAL#	RAND
	v45	0.911742		A1	v45	0.00766504		A1	Blank	0.0221561		A1	v12	0.0792566
	v27	0.918507		A2	Blank	0.0782419		A2	v36	0.050331		A2	v9	0.172457
	v36	0.922159		A3	v21	0.0811599		A3	v47	0.146576		A3	v35	0.251038
	v12	0.924652		A4	v9	0.122217		A4	v10	0.215419		A4	v23	0.31952
	v9	0.960371		A5	v37	0.168794		A5	v15	0.243686		A5	v21	0.340993
	v15	0.985774		A6	v28	0.177011		A6	Blank	0.24962		A6	Blank	0.404326
				B1	v30	0.257387		B1	v35	0.382114		B1	v34	0.41407
				B2	v35	0.309299		B2	Blank	0.389376		B2	v41	0.456296
				B3	v48	0.313464		B3	v12	0.394874		B3	v45	0.460337
				B4	v27	0.323269		B4	v45	0.460918		B4	Blank	0.466679
				B5	Blank	0.380128		B5	v34	0.487817		B5	v37	0.51002
				B6	v10	0.399174		B6	v48	0.549786		B6	v27	0.523685
				C1	v39	0.410015		C1	v30	0.559197		C1	v48	0.548736
				C2	v12	0.416161		C2	v21	0.603865		C2	v39	0.570928
				C3	v7	0.480704		C3	v9	0.652644		C3	Blank	0.642958
				C4	Blank	0.483921		C4	v57	0.681651		C4	Blank	0.703579
				C5	v34	0.510357		C5	v28	0.712142		C5	v57	0.716047
				C6	v41	0.56215		C6	v27	0.852998		C6	v10	0.719318
				D1	Blank	0.585426		D1	v7	0.85551		D1	v28	0.720971
				D2	v36	0.63161		D2	v23	0.884848		D2	v15	0.804816
				D3	v23	0.634197		D3	Blank	0.903366		D3	v7	0.874498
				D4	v57	0.740885		D4	v39	0.944734		D4	v47	0.884824
				D5	v47	0.838024		D5	v37	0.960422		D5	v36	0.961745
				D6	v15	0.94869		D6	v41	0.96124		D6	v30	0.987167
b. Aged Cohort 1: week 2
	Distribution of samples to Plates 1, 2, and 3			Distribution of samples on Plate 1 at 24h				Distribution of samples on Plate 1 at 48h				Distribution of samples on Plate 1 at 72h
	VIAL#	RAND		Plate	VIAL#	RAND		Plate	VIAL#	RAND		Plate	VIAL#	RAND
	v40	0.0143386		A1	v40	0.0116649		A1	v53	0.0495651		A1	v19	0.0278176
	v20	0.0166677		A2	Blank	0.0949342		A2	v20	0.176417		A2	v46	0.0440075
	v58	0.0186277		A3	v20	0.109502		A3	v38	0.189916		A3	v33	0.0828769
	v3	0.046122		A4	v58	0.156434		A4	v40	0.194361		A4	v14	0.107881
	v33	0.0501317		A5	Blank	0.248592		A5	v19	0.236996		A5	v43	0.130386
	v14	0.0652657		A6	v3	0.298744		A6	v16	0.251659		A6	v53	0.176738
	v42	0.0983379		B1	v33	0.318874		B1	Blank	0.303124		B1	v38	0.290287
	v49	0.131852		B2	v14	0.465745		B2	v26	0.324503		B2	v56	0.305621
	v43	0.131978		B3	v42	0.484944		B3	v51	0.352801		B3	v42	0.316487
	v46	0.137072		B4	Blank	0.509272		B4	v3	0.354305		B4	v2	0.324266
	v26	0.151346		B5	v49	0.522296		B5	v2	0.393036		B5	v31	0.329241
	v16	0.15231		B6	v43	0.522563		B6	v46	0.441792		B6	Blank	0.332234
	v55	0.15553		C1	v46	0.54524		C1	v56	0.515877		C1	Blank	0.381913
	v56	0.196882		C2	v26	0.564514		C2	v49	0.518387		C2	v40	0.504624
	v38	0.199523		C3	v16	0.590832		C3	Blank	0.62165		C3	v51	0.539571
	v19	0.204994		C4	v55	0.655336		C4	Blank	0.687718		C4	Blank	0.585245
	v51	0.213998		C5	v56	0.738942		C5	v55	0.746082		C5	v49	0.591435
	v53	0.216401		C6	v38	0.846843		C6	v14	0.792324		C6	v16	0.696392
	v31	0.220822		D1	Blank	0.867444		D1	Blank	0.813764		D1	v20	0.862597
	v2	0.236107		D2	v19	0.870805		D2	v31	0.952881		D2	v58	0.872027
	v6	0.236179		D3	v51	0.905689		D3	v58	0.961342		D3	Blank	0.912735
	v11	0.259382		D4	v53	0.959367		D4	v42	0.990275		D4	v26	0.93277
	v29	0.260681		D5	v31	0.97334		D5	v33	0.993364		D5	v3	0.952164
	v60	0.267319		D6	v2	0.976322		D6	v43	0.995817		D6	v55	0.959992
	v50	0.269194
	v44	0.277239		Distribution of samples on Plate 2 at 24h				Distribution of samples on Plate 2 at 48h				Distribution of samples on Plate 2 at 72h
	v32	0.316787		Plate	VIAL#	RAND		Plate	VIAL#	RAND		Plate	VIAL#	RAND
	v18	0.326567		A1	v6	0.00414542		A1	v32	0.0395182		A1	v18	0.00064138
	v25	0.35611		A2	v11	0.0590029		A2	v44	0.0462593		A2	v22	0.0282377
	v54	0.359982		A3	v29	0.0600644		A3	v8	0.119252		A3	v44	0.0817081
	v59	0.375135		A4	Blank	0.154771		A4	v54	0.122818		A4	v24	0.0882536
	v22	0.375601		A5	v60	0.19977		A5	v13	0.125419		A5	v29	0.130921
	v1	0.375809		A6	v50	0.283589		A6	Blank	0.163752		A6	v5	0.179063
	v24	0.418875		B1	v44	0.294943		B1	v52	0.219957		B1	v1	0.222618
	v8	0.460044		B2	v32	0.332257		B2	v6	0.257984		B2	v60	0.264519
	v13	0.463241		B3	v18	0.497802		B3	v60	0.259269		B3	Blank	0.282985
	v17	0.523023		B4	v25	0.521839		B4	v25	0.271018		B4	Blank	0.340923
	v52	0.523619		B5	v54	0.525474		B5	v11	0.27494		B5	Blank	0.347902
	v4	0.5336		B6	Blank	0.551197		B6	v29	0.316221		B6	v50	0.379375
	v5	0.567754		C1	v59	0.554617		C1	v5	0.350158		C1	Blank	0.410213
	v21	0.578695		C2	v22	0.619828		C2	v50	0.387563		C2	v32	0.452807
	v39	0.586116		C3	Blank	0.648247		C3	Blank	0.420703		C3	v13	0.488866
	v57	0.618797		C4	v1	0.66215		C4	v17	0.475666		C4	v17	0.539321
	v35	0.621383		C5	v24	0.684835		C5	v59	0.487925		C5	v8	0.546735
	v28	0.690008		C6	v8	0.765336		C6	v24	0.540654		C6	v4	0.553157
	v41	0.718115		D1	v13	0.774607		D1	Blank	0.683453		D1	v52	0.616432
	v12	0.727346		D2	Blank	0.854802		D2	v4	0.739621		D2	v59	0.735283
	v47	0.743737		D3	v17	0.859381		D3	v1	0.896689		D3	v11	0.735918
	v34	0.75897		D4	v52	0.891288		D4	v18	0.909574		D4	v6	0.749865
	v30	0.762742		D5	v4	0.958732		D5	v22	0.940949		D5	v54	0.953841
	v27	0.778879		D6	v5	0.974176		D6	Blank	0.982634		D6	v25	0.974484
	v15	0.786454
	v9	0.795815		Distribution of samples on Plate 3 at 24h				Distribution of samples on Plate 3 at 48h				Distribution of samples on Plate 3 at 72h
	v10	0.804855		Plate	VIAL#	RAND		Plate	VIAL#	RAND		Plate	VIAL#	RAND
	v23	0.840077		A1	v21	0.0118389		A1	v37	0.0581515		A1	v7	0.070314
	v48	0.878602		A2	v39	0.0164581		A2	Blank	0.0666351		A2	v10	0.0782663
	v37	0.878721		A3	v57	0.113505		A3	v12	0.0990188		A3	v15	0.0847144
	v7	0.945702		A4	v35	0.127986		A4	v27	0.119201		A4	v30	0.106214
	v36	0.948245		A5	v28	0.202962		A5	v23	0.175055		A5	v47	0.109592
	v45	0.953375		A6	Blank	0.227787		A6	Blank	0.372725		A6	v57	0.169481
				B1	v41	0.295127		B1	v39	0.40415		B1	v35	0.218455
				B2	Blank	0.301731		B2	v28	0.448873		B2	v21	0.226789
				B3	v12	0.360689		B3	v21	0.456827		B3	v37	0.278135
				B4	v47	0.379492		B4	v36	0.464127		B4	Blank	0.281428
				B5	v34	0.421996		B5	Blank	0.485981		B5	v28	0.318305
				B6	v30	0.461518		B6	v34	0.487074		B6	Blank	0.32819
				C1	v27	0.482681		C1	v41	0.519546		C1	v48	0.347366
				C2	v15	0.573464		C2	v15	0.534428		C2	v27	0.519242
				C3	v9	0.574415		C3	v7	0.576092		C3	v9	0.522381
				C4	Blank	0.602328		C4	v30	0.719899		C4	Blank	0.562474
				C5	v10	0.638756		C5	v47	0.748772		C5	v39	0.576771
				C6	Blank	0.775692		C6	v45	0.76503		C6	v41	0.721431
				D1	v23	0.785783		D1	v35	0.768382		D1	Blank	0.735264
				D2	v48	0.824287		D2	v57	0.82042		D2	v45	0.763013
				D3	v37	0.824337		D3	v9	0.822607		D3	v34	0.774226
				D4	v7	0.852707		D4	v48	0.95392		D4	v12	0.879752
				D5	v36	0.863874		D5	v10	0.962672		D5	v36	0.900289
				D6	v45	0.987604		D6	Blank	0.9635		D6	v23	0.954727
c. Aged Cohort 2: week 3
	Distribution of samples to Plates 1, 2, and 3			Distribution of samples on Plate 1 at 24h				Distribution of samples on Plate 1 at 48h				Distribution of samples on Plate 1 at 72h
	VIAL#	RAND		Plate	VIAL#	RAND		Plate	VIAL#	RAND		Plate	VIAL#	RAND
	v13	0.0566212		A1	v1	0.0378963		A1	v50	0.00812913		A1	v56	0.0204053
	v1	0.0784369		A2	v25	0.0539767		A2	v54	0.0390312		A2	Blank	0.0270504
	v54	0.092309		A3	Blank	0.0878256		A3	v12	0.0700076		A3	v7	0.0573786
	v57	0.0935155		A4	v20	0.0958218		A4	v25	0.124776		A4	v21	0.080085
	v20	0.158253		A5	v27	0.112222		A5	v18	0.167953		A5	v30	0.106773
	v5	0.178062		A6	Blank	0.169584		A6	Blank	0.201573		A6	v29	0.112672
	v50	0.181864		B1	v12	0.216001		B1	v7	0.205		B1	v50	0.133985
	v32	0.211867		B2	v32	0.224194		B2	v5	0.241941		B2	v48	0.221848
	v30	0.22777		B3	v48	0.299565		B3	v21	0.261765		B3	v20	0.249947
	v18	0.267625		B4	v38	0.401962		B4	v20	0.362625		B4	v5	0.266062
	v56	0.288684		B5	v30	0.592741		B5	v27	0.387847		B5	Blank	0.343302
	v48	0.291028		B6	Blank	0.63085		B6	v32	0.481817		B6	v27	0.37668
	v12	0.296981		C1	v50	0.643468		C1	v57	0.511382		C1	Blank	0.416747
	v25	0.316697		C2	v26	0.682353		C2	v26	0.551601		C2	v1	0.427037
	v7	0.33712		C3	v5	0.690515		C3	Blank	0.561232		C3	v12	0.470038
	v29	0.339829		C4	v57	0.706831		C4	Blank	0.578516		C4	v25	0.52131
	v27	0.357805		C5	v21	0.764944		C5	v30	0.631491		C5	v18	0.545186
	v26	0.365605		C6	Blank	0.787722		C6	v56	0.642453		C6	v54	0.570503
	v38	0.382636		D1	v29	0.797595		D1	v38	0.701261		D1	v26	0.680416
	v21	0.388123		D2	v7	0.806645		D2	v1	0.753042		D2	v57	0.787502
	v44	0.414129		D3	v13	0.838481		D3	v13	0.774478		D3	v13	0.80681
	v34	0.420538		D4	v56	0.850318		D4	v48	0.895275		D4	v32	0.836781
	v52	0.427112		D5	v18	0.971542		D5	v29	0.902945		D5	v38	0.924335
	v11	0.433144		D6	v54	0.979805		D6	Blank	0.920865		D6	Blank	0.956046
	v28	0.437883
	v36	0.443683		Distribution of samples on Plate 2 at 24h				Distribution of samples on Plate 2 at 48h				Distribution of samples on Plate 2 at 72h
	v22	0.449403		Plate	VIAL#	RAND		Plate	VIAL#	RAND		Plate	VIAL#	RAND
	v24	0.460181		A1	v22	0.0282835		A1	Blank	0.0285813		A1	v44	0.0466022
	v53	0.465713		A2	v49	0.0629841		A2	v34	0.0438198		A2	v58	0.137116
	v43	0.469891		A3	v52	0.107677		A3	v16	0.0482142		A3	v36	0.17145
	v60	0.497309		A4	v53	0.151838		A4	v22	0.110982		A4	Blank	0.179535
	v8	0.503819		A5	v41	0.152347		A5	v11	0.155271		A5	v8	0.215721
	v19	0.553519		A6	v11	0.168638		A6	v43	0.160808		A6	v24	0.238695
	v41	0.556709		B1	v58	0.172525		B1	v8	0.177713		B1	Blank	0.239426
	v15	0.567002		B2	v45	0.21004		B2	v60	0.202485		B2	v16	0.295792
	v49	0.589153		B3	v34	0.482266		B3	v52	0.216456		B3	Blank	0.364859
	v40	0.593144		B4	v15	0.538963		B4	v40	0.279281		B4	v45	0.38966
	v45	0.593916		B5	Blank	0.613782		B5	v49	0.299982		B5	v41	0.472277
	v16	0.6111		B6	v19	0.642054		B6	v36	0.345068		B6	v40	0.513723
	v58	0.613666		C1	v28	0.652452		C1	v28	0.405502		C1	v22	0.521683
	v14	0.618378		C2	v24	0.656236		C2	v45	0.412925		C2	v49	0.571856
	v3	0.622417		C3	v8	0.671151		C3	v19	0.423951		C3	v15	0.583385
	v2	0.688473		C4	Blank	0.673042		C4	v44	0.456886		C4	v43	0.587097
	v59	0.690923		C5	Blank	0.712289		C5	v58	0.485739		C5	v19	0.706751
	v31	0.705601		C6	v40	0.721455		C6	v24	0.486554		C6	v34	0.707925
	v37	0.737706		D1	v44	0.756269		D1	Blank	0.496414		D1	v53	0.729463
	v47	0.739549		D2	v60	0.805542		D2	Blank	0.716118		D2	v60	0.821868
	v35	0.765469		D3	v36	0.846456		D3	v41	0.751911		D3	v11	0.8669
	v42	0.769521		D4	Blank	0.856654		D4	Blank	0.778544		D4	Blank	0.947997
	v51	0.775519		D5	v16	0.936105		D5	v15	0.832702		D5	v28	0.96207
	v6	0.813274		D6	v43	0.939793		D6	v53	0.863873		D6	v52	0.990722
	v33	0.859219
	v46	0.862714		Distribution of samples on Plate 3 at 24h				Distribution of samples on Plate 3 at 48h				Distribution of samples on Plate 3 at 72h
	v4	0.893373		Plate	VIAL#	RAND		Plate	VIAL#	RAND		Plate	VIAL#	RAND
	v23	0.903472		A1	v55	0.103267		A1	v4	0.0422133		A1	v33	0.0096266
	v9	0.914621		A2	v3	0.125907		A2	v23	0.0455779		A2	v35	0.0484542
	v55	0.926166		A3	v37	0.192278		A3	v42	0.0978289		A3	v2	0.0648292
	v39	0.931509		A4	v31	0.218502		A4	v17	0.102079		A4	v10	0.122063
	v17	0.974775		A5	v51	0.248625		A5	Blank	0.130394		A5	v4	0.18068
	v10	0.996825		A6	v6	0.309681		A6	v14	0.136361		A6	v31	0.215099
				B1	v17	0.316571		B1	v51	0.208925		B1	v39	0.28125
				B2	v9	0.336029		B2	v35	0.328312		B2	v47	0.308192
				B3	v14	0.367679		B3	v31	0.378642		B3	v55	0.34033
				B4	v46	0.407589		B4	v55	0.396109		B4	v23	0.343131
				B5	Blank	0.40843		B5	v39	0.420488		B5	Blank	0.366414
				B6	v39	0.412327		B6	v10	0.456363		B6	Blank	0.554508
				C1	v2	0.429191		C1	Blank	0.551491		C1	v46	0.560637
				C2	v35	0.461923		C2	v33	0.554229		C2	v37	0.570929
				C3	v59	0.536639		C3	v47	0.557021		C3	v17	0.594361
				C4	v42	0.570479		C4	v6	0.587529		C4	v6	0.646644
				C5	v10	0.634792		C5	v37	0.594034		C5	Blank	0.797742
				C6	v33	0.65886		C6	v9	0.607144		C6	v42	0.798476
				D1	Blank	0.665779		D1	v46	0.767192		D1	v51	0.800926
				D2	v4	0.787835		D2	v59	0.796184		D2	Blank	0.834782
				D3	Blank	0.80389		D3	Blank	0.827816		D3	v3	0.919789
				D4	v23	0.838942		D4	v3	0.85255		D4	v14	0.953272
				D5	v47	0.882144		D5	Blank	0.907234		D5	v59	0.974831
				D6	Blank	0.975334		D6	v2	0.987568		D6	v9	0.988915
d. Young Cohort 2: week 4
	Distribution of samples to Plates 1, 2, and 3			Distribution of samples on Plate 1 at 24h				Distribution of samples on Plate 1 at 48h				Distribution of samples on Plate 1 at 72h
	VIAL#	RAND		Plate	VIAL#	RAND		Plate	VIAL#	RAND		Plate	VIAL#	RAND
	v10	0.0333713		A1	v1	0.0253389		A1	v17	0.123059		A1	v47	0.223941
	v25	0.0365054		A2	Blank	0.0520269		A2	v53	0.124483		A2	v27	0.226527
	v53	0.0467466		A3	v25	0.0771863		A3	v21	0.169152		A3	v40	0.227745
	v52	0.0830834		A4	v10	0.111048		A4	v40	0.180884		A4	v44	0.343114
	v26	0.10806		A5	Blank	0.140678		A5	v25	0.192794		A5	v53	0.381655
	v22	0.115454		A6	v53	0.231396		A6	v15	0.227938		A6	v1	0.416046
	v17	0.128515		B1	v39	0.274837		B1	v47	0.232848		B1	Blank	0.41623
	v44	0.154939		B2	v50	0.286965		B2	v10	0.268452		B2	Blank	0.423425
	v21	0.156154		B3	v15	0.395826		B3	v1	0.314669		B3	Blank	0.429563
	v27	0.160818		B4	v26	0.418131		B4	Blank	0.338566		B4	v56	0.484411
	v16	0.180047		B5	v44	0.422852		B5	v30	0.349279		B5	v22	0.496996
	v39	0.188201		B6	v30	0.431838		B6	v52	0.399072		B6	v16	0.605806
	v1	0.188474		C1	v21	0.454049		C1	v39	0.418456		C1	v10	0.608764
	v15	0.191061		C2	Blank	0.480628		C2	Blank	0.419227		C2	Blank	0.639876
	v30	0.201899		C3	v52	0.527792		C3	v56	0.444876		C3	v25	0.648324
	v56	0.238997		C4	v56	0.578523		C4	v26	0.51562		C4	v39	0.664963
	v47	0.244544		C5	v40	0.629239		C5	Blank	0.523627		C5	v50	0.696725
	v46	0.251033		C6	v27	0.664446		C6	v16	0.567973		C6	v26	0.722874
	v40	0.262878		D1	v46	0.735322		D1	v22	0.609493		D1	v15	0.731232
	v50	0.263088		D2	Blank	0.810193		D2	v44	0.738206		D2	v52	0.732516
	v6	0.269603		D3	v22	0.883928		D3	v50	0.785078		D3	v30	0.752192
	v45	0.285762		D4	v47	0.894044		D4	Blank	0.883185		D4	v17	0.774385
	v14	0.291894		D5	v17	0.97023		D5	v27	0.976167		D5	v46	0.883441
	v33	0.298544		D6	v16	0.986874		D6	v46	0.979297		D6	v21	0.993666
	v57	0.315136
	v43	0.351037		Distribution of samples on Plate 2 at 24h				Distribution of samples on Plate 2 at 48h				Distribution of samples on Plate 2 at 72h
	v5	0.355148		Plate	VIAL#	RAND		Plate	VIAL#	RAND		Plate	VIAL#	RAND
	v59	0.365769		A1	v6	0.0443276		A1	v33	0.138169		A1	v57	0.0390036
	v42	0.394753		A2	v55	0.0628372		A2	v36	0.167843		A2	v42	0.043563
	v36	0.433703		A3	v57	0.100329		A3	v28	0.184316		A3	Blank	0.143499
	v48	0.448553		A4	Blank	0.114502		A4	v34	0.213709		A4	v34	0.183354
	v13	0.451483		A5	v36	0.153429		A5	v42	0.355373		A5	v5	0.225984
	v34	0.456287		A6	v32	0.222494		A6	v57	0.364682		A6	v48	0.271211
	v55	0.489445		B1	v5	0.229422		B1	Blank	0.366352		B1	Blank	0.297862
	v32	0.507177		B2	v14	0.326971		B2	v43	0.37159		B2	v33	0.299625
	v51	0.522883		B3	Blank	0.342883		B3	v5	0.394223		B3	v45	0.390941
	v20	0.603703		B4	Blank	0.379419		B4	v51	0.432382		B4	v43	0.4506
	v54	0.625138		B5	v54	0.426527		B5	v6	0.451394		B5	v32	0.5095
	v24	0.636426		B6	v33	0.434977		B6	v24	0.475486		B6	Blank	0.524006
	v28	0.650787		C1	Blank	0.472967		C1	Blank	0.571615		C1	v20	0.5271
	v18	0.654236		C2	v59	0.537477		C2	v55	0.614364		C2	v24	0.603705
	v19	0.685899		C3	v45	0.609319		C3	Blank	0.62285		C3	v14	0.637286
	v7	0.689677		C4	v13	0.614051		C4	v48	0.639611		C4	v59	0.650666
	v49	0.69459		C5	v34	0.614354		C5	v13	0.684122		C5	v36	0.669639
	v12	0.706728		C6	v42	0.680545		C6	v59	0.742104		C6	v6	0.678329
	v31	0.707246		D1	v48	0.760866		D1	Blank	0.818244		D1	v28	0.696351
	v11	0.737909		D2	v43	0.772526		D2	v14	0.881509		D2	v55	0.724522
	v23	0.75526		D3	v24	0.774483		D3	v45	0.890687		D3	v54	0.848878
	v8	0.76084		D4	v51	0.826077		D4	v20	0.908434		D4	v13	0.857533
	v38	0.784864		D5	v28	0.924135		D5	v54	0.971946		D5	v51	0.975278
	v29	0.787271		D6	v20	0.994738		D6	v32	0.98509		D6	Blank	0.979865
	v9	0.800232
	v3	0.809696		Distribution of samples on Plate 3 at 24h				Distribution of samples on Plate 3 at 48h				Distribution of samples on Plate 3 at 72h
	v4	0.88258		Plate	VIAL#	RAND		Plate	VIAL#	RAND		Plate	VIAL#	RAND
	v58	0.890977		A1	v29	0.061792		A1	v23	0.0420851		A1	v18	0.032147
	v41	0.893997		A2	v49	0.100016		A2	v37	0.0767972		A2	v23	0.0879044
	v37	0.952012		A3	Blank	0.102769		A3	v31	0.0899807		A3	v35	0.0942353
	v35	0.982147		A4	v60	0.118921		A4	v41	0.0913355		A4	v11	0.155585
	v2	0.984472		A5	v3	0.162054		A5	Blank	0.0996056		A5	v8	0.159265
	v60	0.98794		A6	Blank	0.298069		A6	v49	0.159152		A6	v9	0.306623
				B1	v11	0.30297		B1	v3	0.276003		B1	v4	0.393758
				B2	v58	0.321287		B2	v18	0.28473		B2	Blank	0.46367
				B3	v7	0.346349		B3	v29	0.332		B3	v38	0.495605
				B4	Blank	0.380321		B4	v7	0.634278		B4	Blank	0.500086
				B5	v9	0.421931		B5	v38	0.661801		B5	v3	0.565062
				B6	v2	0.42563		B6	v9	0.712891		B6	v19	0.611266
				C1	v31	0.448692		C1	v35	0.720723		C1	v31	0.620458
				C2	v23	0.505716		C2	v12	0.738063		C2	Blank	0.681349
				C3	v35	0.508952		C3	Blank	0.740741		C3	v49	0.684977
				C4	v18	0.591795		C4	v60	0.800532		C4	v12	0.697869
				C5	v38	0.596446		C5	v19	0.826956		C5	v41	0.735285
				C6	v4	0.608858		C6	Blank	0.834868		C6	v37	0.743737
				D1	v41	0.679178		D1	Blank	0.851397		D1	v58	0.875038
				D2	v19	0.708086		D2	v2	0.907262		D2	v29	0.957632
				D3	Blank	0.819315		D3	v8	0.937141		D3	v2	0.969726
				D4	v12	0.826759		D4	v11	0.961178		D4	v7	0.97099
				D5	v8	0.93348		D5	v4	0.967909		D5	Blank	0.99442
				D6	v37	0.940496		D6	v58	0.972938		D6	v60	0.996085
